# Supplementary material for: Targeting tRNA-synthetase interactions towards novel therapeutic discovery against eukaryotic pathogens
Source: PubMed Central journal article supplement (PMC7046186; doi:10.1371/journal.pntd.0007983), 2020-02-27

# Number of tRNA Functional Classes and Missing Classes by Genome among 3571 Unambiguously Annotated Genes in Union Annotation Gene-Set

Missing classes labelled above bars. Ten additional intron-containing genes found by both gene-finders (two in *T. cruzi* Tulaci2), were annotated as tRNA<sup>Tyr</sup> (in red).

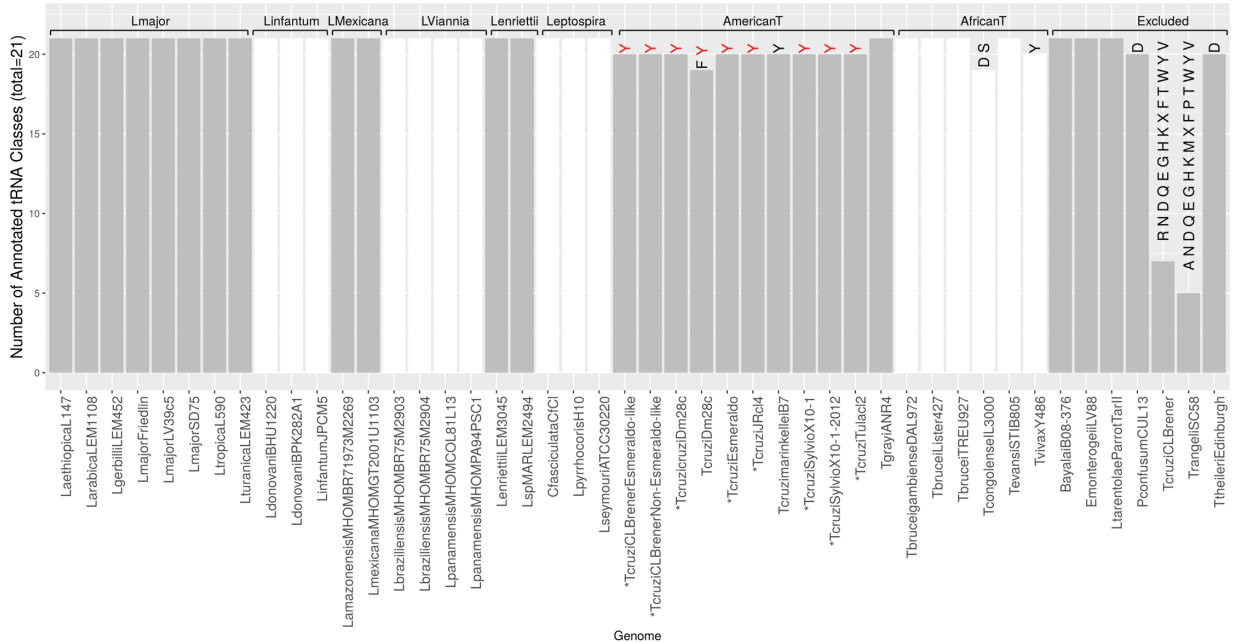

Supplement: pntd.0007983.s002.pdf [file pntd.0007983.s002.pdf]
