# Supplementary material for: Targeting tRNA-synthetase interactions towards novel therapeutic discovery against eukaryotic pathogens
Source: PubMed Central journal article supplement (PMC7046186; doi:10.1371/journal.pntd.0007983), 2020-02-27

**Major (n = 8) Q**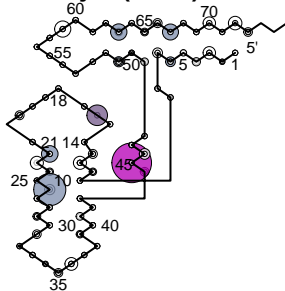**Infantum (n = 3) Q**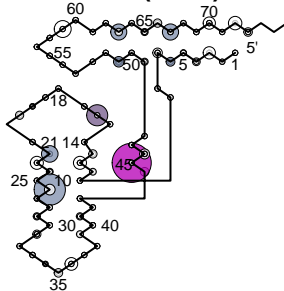**Mexicana (n = 2) Q**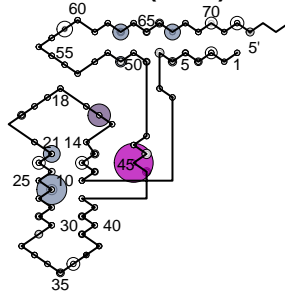**Viannia (n = 4) Q**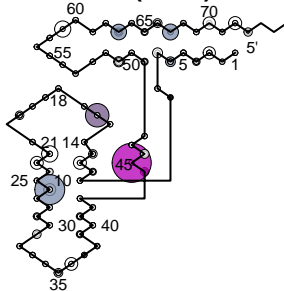**Af. Tryp. (n = 6) Q**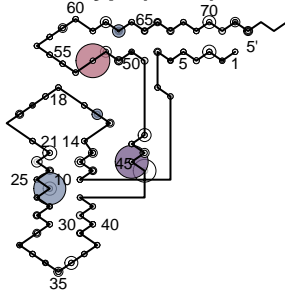**Am. Tryp. (n = 11) Q**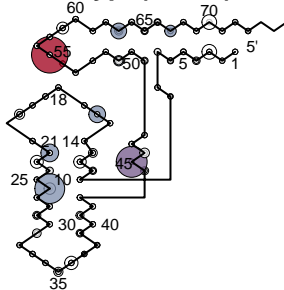**Lepto/Crith (n = 3) Q**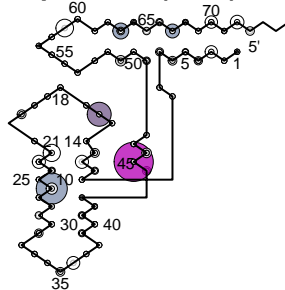**Enriettii (n = 2) Q**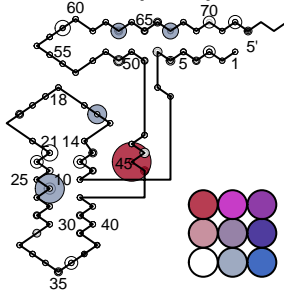

Supplement: pntd.0007983.s010.pdf [file pntd.0007983.s010.pdf]
