# Supplementary material for: Targeting tRNA-synthetase interactions towards novel therapeutic discovery against eukaryotic pathogens
Source: PubMed Central journal article supplement (PMC7046186; doi:10.1371/journal.pntd.0007983), 2020-02-27

**Major (n = 8) N**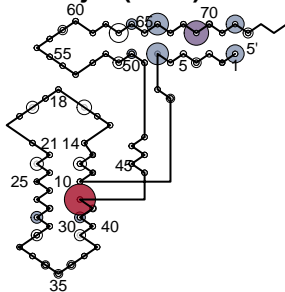**Infantum (n = 3) N**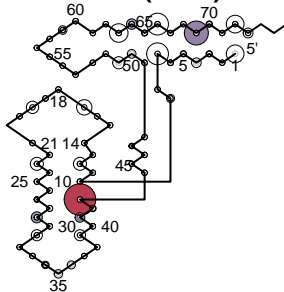**Mexicana (n = 2) N**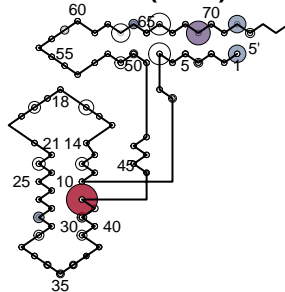**Viannia (n = 4) N**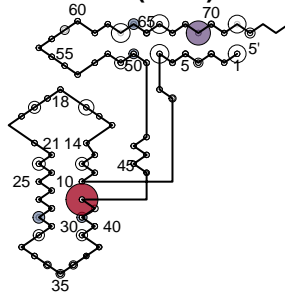**Af. Tryp. (n = 6) N**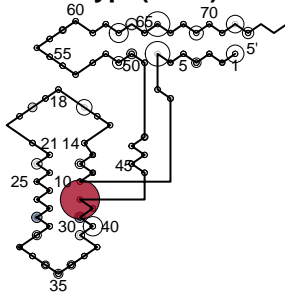**Am. Tryp. (n = 11) N**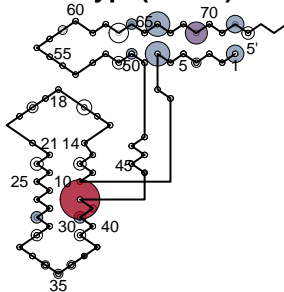**Lepto/Crith (n = 3) N**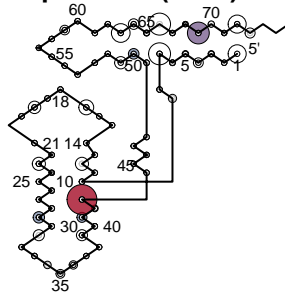**Enriettii (n = 2) N**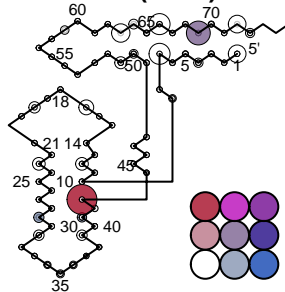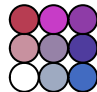

Supplement: pntd.0007983.s019.pdf [file pntd.0007983.s019.pdf]
