# Supplementary material for: Targeting tRNA-synthetase interactions towards novel therapeutic discovery against eukaryotic pathogens
Source: PubMed Central journal article supplement (PMC7046186; doi:10.1371/journal.pntd.0007983), 2020-02-27

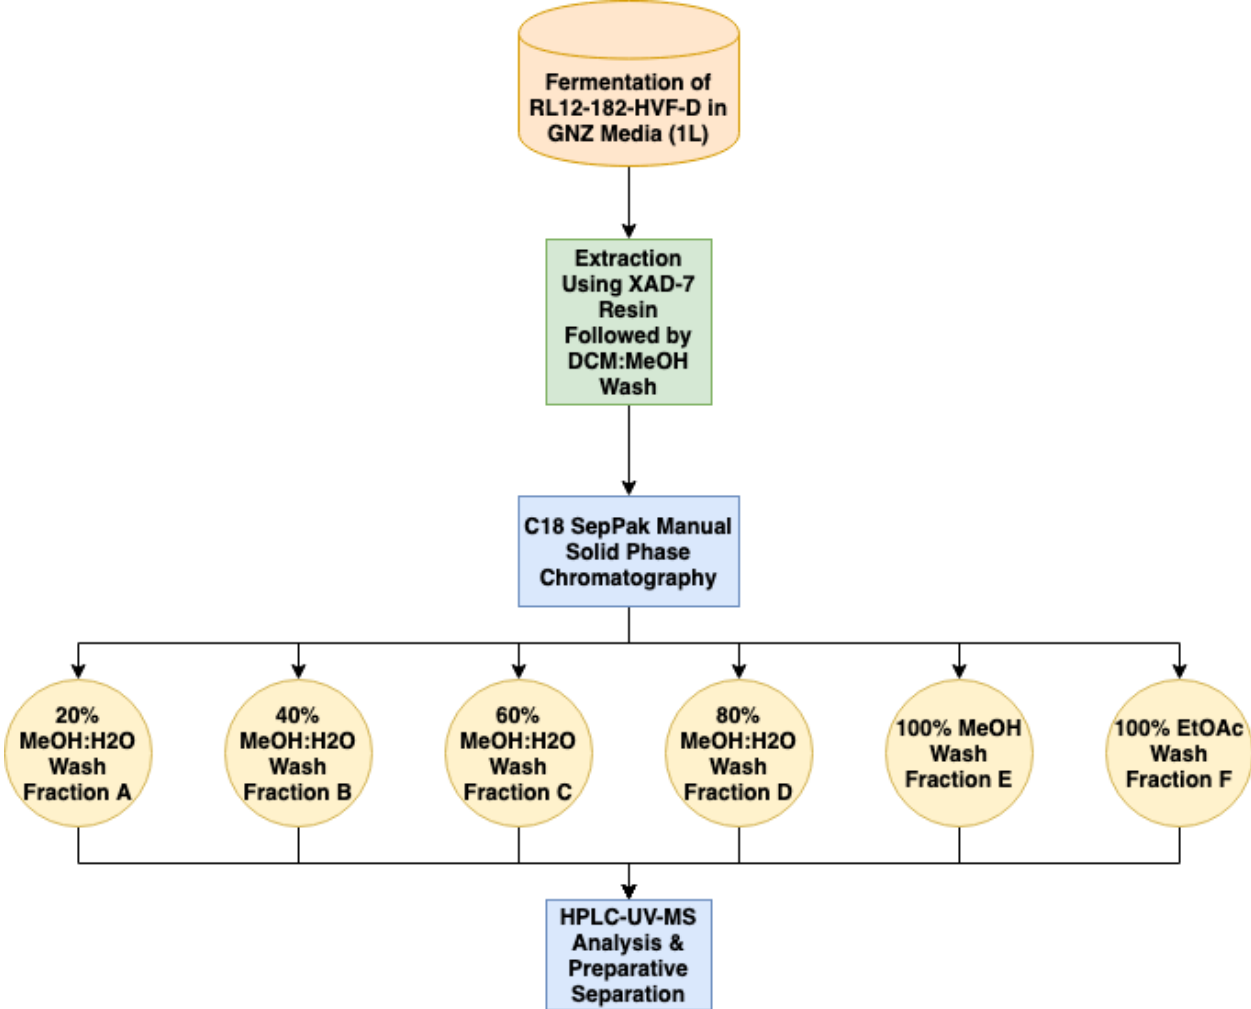

Supplement: pntd.0007983.s043.pdf [file pntd.0007983.s043.pdf]
