# Supplementary material for: Targeting tRNA-synthetase interactions towards novel therapeutic discovery against eukaryotic pathogens
Source: PubMed Central journal article supplement (PMC7046186; doi:10.1371/journal.pntd.0007983), 2020-02-27

DAD1 A, Sig=210.4 Ref=360.100 (F:\DATA\DENNIS\20180220\_2096\_SP\_GNZ\_C\_F10F9\_10UL\_R2.D)

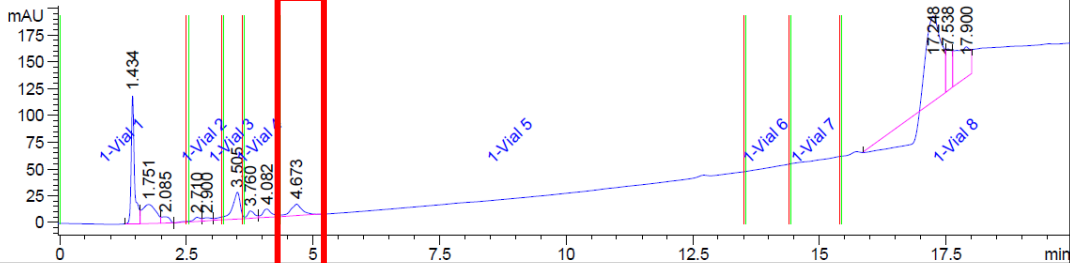

DAD1 B, Sig=230.4 Ref=360.100 (F:\DATA\DENNIS\20180220\_2096\_SP\_GNZ\_C\_F10F9\_10UL\_R2.D)

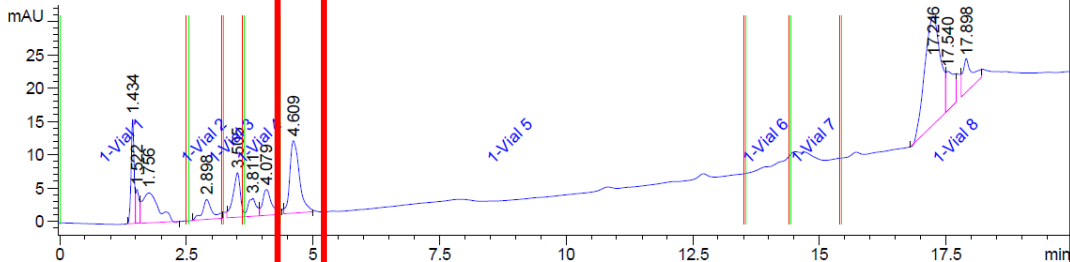

DAD1 C, Sig=254.4 Ref=360.100 (F:\DATA\DENNIS\20180220\_2096\_SP\_GNZ\_C\_F10F9\_10UL\_R2.D)

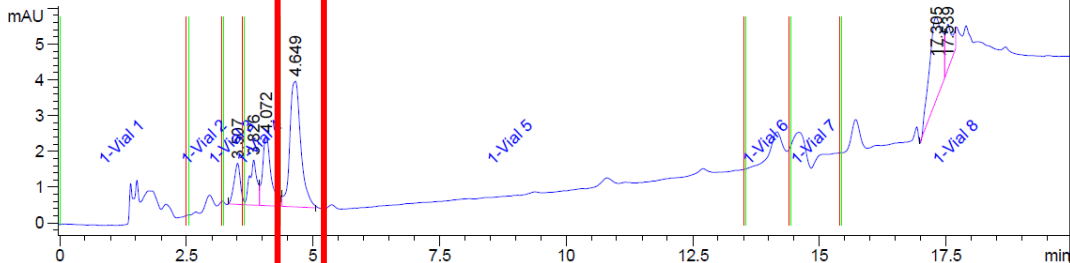

DAD1 D, Sig=280.16 Ref=360.100 (F:\DATA\DENNIS\20180220\_2096\_SP\_GNZ\_C\_F10F9\_10UL\_R2.D)

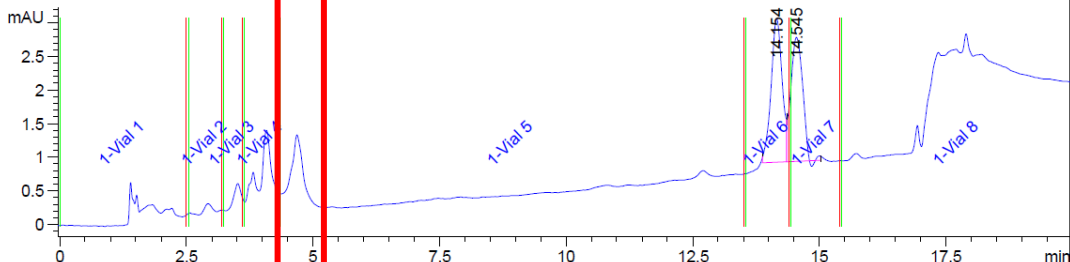

DAD1 E, Sig=450.4 Ref=360.100 (F:\DATA\DENNIS\20180220\_2096\_SP\_GNZ\_C\_F10F9\_10UL\_R2.D)

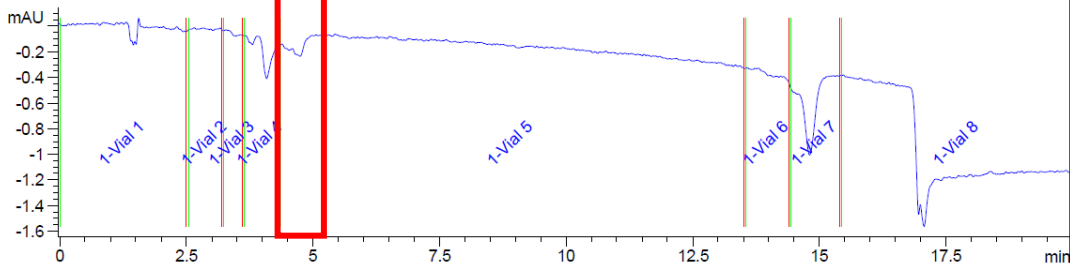

Supplement: pntd.0007983.s044.pdf [file pntd.0007983.s044.pdf]
