# Supplementary material for: Targeting tRNA-synthetase interactions towards novel therapeutic discovery against eukaryotic pathogens
Source: PubMed Central journal article supplement (PMC7046186; doi:10.1371/journal.pntd.0007983), 2020-02-27
Supplement: pntd.0007983.s046.pdf [file pntd.0007983.s046.pdf]

**Supplementary Table 1 —Similar and putatively homologous tRNA gene cluster variant groups of length at least three occurring in at least two *Leishmania* genomes.**

| <b>Group</b> | <b>Gene Cluster Variant / Strandedness</b> | <b>Frequency</b> |
|--------------|--------------------------------------------|------------------|
| 1            | <b>DSA / - - +</b>                         | 21               |
| 2            | <b>GAL / - - +</b>                         | 7                |
| 2            | <b>LAG / - + +</b>                         | 10               |
| 3            | <b>KGN / + - -</b>                         | 13               |
| 4            | <b>KVP / - - -</b>                         | 2                |
| 4            | <b>PVK + + +</b>                           | 20               |
| 5            | <b>LXP / - - +</b>                         | 5                |
| 5            | <b>CLXP / + - - +</b>                      | 16               |
| 6            | <b>MRR / - + +</b>                         | 2                |
| 7            | <b>QLI / + - +</b>                         | 19               |
| 7            | <b>IVQRLTRKGW / + - - - - + + - +</b>      | 18               |
| 8            | <b>RRA / - - +</b>                         | 19               |
| 8            | <b>EARR / - - + +</b>                      | 2                |
| 9            | <b>TGP / - - +</b>                         | 2                |
| 9            | <b>GTGP / + - - +</b>                      | 12               |
| 9            | <b>PGTTG / - + + - -</b>                   | 4                |
| 10           | <b>VHF / + + -</b>                         | 15               |
| 10           | <b>EVRH / - - + +</b>                      | 21               |
| 11           | <b>YTTT / - - - +</b>                      | 2                |
| 11           | <b>YTTY / - - + +</b>                      | 8                |
| 12           | <b>NPTYN / - - + + +</b>                   | 8                |
| 12           | <b>NYTPN / - - - + +</b>                   | 14               |
| 13           | <b>SLMIV / - + - - +</b>                   | 3                |
| 13           | <b>VIMLS / - + + - +</b>                   | 18               |
