# Supplementary material for: Targeting tRNA-synthetase interactions towards novel therapeutic discovery against eukaryotic pathogens
Source: PubMed Central journal article supplement (PMC7046186; doi:10.1371/journal.pntd.0007983), 2020-02-27
Supplement: pntd.0007983.s047.pdf [file pntd.0007983.s047.pdf]

Supplementary Table 2 — Similar and putatively homologous tRNA gene cluster variant groups of length at least three occurring in at least two *Trypanosoma* genomes.

| Group | Gene Cluster Variant / Strandedness | Frequency |
|-------|-------------------------------------|-----------|
| 1     | ARF / -- +                          | 10        |
| 1     | FRA / - + +                         | 5         |
| 2     | ASD / -- +                          | 7         |
| 2     | DSA / - + +                         | 14        |
| 3     | FEV / -- +                          | 5         |
| 3     | HEF / + + +                         | 6         |
| 3     | VEF / - + +                         | 7         |
| 4     | IQL / - + +                         | 7         |
| 4     | LQI / -- +                          | 6         |
| 4     | ILQQI / + -- + +                    | 3         |
| 5     | LXP / -- +                          | 6         |
| 5     | LXP / + - +                         | 5         |
| 5     | PXL / - + +                         | 6         |
| 6     | NTP / -- +                          | 2         |
| 6     | PTN / - + +                         | 8         |
| 7     | SLS / + --                          | 4         |
| 8     | VLM / ---                           | 5         |
| 8     | EMSV / - + - +                      | 4         |
| 8     | LSMEMYV / - + - - + - +             | 2         |
| 8     | LSMEMYV / - + - + + - +             | 3         |
| 8     | VYMEMSL / - + - - + - +             | 2         |
| 9     | GLTR / + + - +                      | 6         |
| 9     | IQVKGLTRKR / - + + + + - - + + -    | 7         |
| 9     | RKRTLGVQI / + - - + + - - - +       | 3         |
| 10    | IQVK / - + + +                      | 4         |
| 11    | NARK / + - + +                      | 2         |
| 11    | NARKR / + - + + +                   | 11        |
