# Supplementary material for: Targeting tRNA-synthetase interactions towards novel therapeutic discovery against eukaryotic pathogens
Source: PubMed Central journal article supplement (PMC7046186; doi:10.1371/journal.pntd.0007983), 2020-02-27
Supplement: pntd.0007983.s048.pdf [file pntd.0007983.s048.pdf]

**Supplementary Table 3 — Similar and putatively homologous tRNA gene cluster variant groups of length at least three spanning both *Leishmania* (L) and *Trypanosoma* (T) genera genomes. Only groups 1, 3 and 4 contain five gene cluster variants conserved in both genera, namely, ASD, DSA, LXP (two variants), and QLI, where “X” represents the initiator iMet tRNA gene.**

| Group | Gene Cluster Variant / Strandedness | Frequency | Clade |
|-------|-------------------------------------|-----------|-------|
| 1     | ARF / -- +                          | 10        | T     |
| 1     | FRA / - + +                         | 5         | T     |
| 1     | RRA / -- +                          | 19        | L     |
| 1     | EARR / -- + +                       | 2         | L     |
| 2     | ASD / -- +                          | 8         | L, T  |
| 2     | DSA / - + +                         | 35        | L, T  |
| 3     | FEV / -- +                          | 5         | T     |
| 3     | HEF / + + +                         | 6         | T     |
| 3     | VEF / - + +                         | 7         | T     |
| 3     | VHF / + + -                         | 15        | L     |
| 3     | EVRH / -- + +                       | 21        | L     |
| 4     | IQL / - + +                         | 7         | T     |
| 4     | LQI / -- +                          | 6         | T     |
| 4     | QLI / + - +                         | 19        | L, T  |
| 4     | ILQQI / + - - + +                   | 3         | T     |
| 5     | LXP / -- +                          | 11        | L, T  |
| 5     | LXP / + - +                         | 5         | L, T  |
| 5     | PXL / - + +                         | 6         | T     |
| 5     | CLXP / + - - +                      | 16        | L     |
| 6     | NTP / -- +                          | 2         | T     |
| 6     | PTN / - + +                         | 8         | T     |
| 6     | NPTYN / -- + + +                    | 8         | L     |
| 6     | NYTPN / -- - + +                    | 14        | L     |
| 7     | VLM / -- -                          | 5         | T     |
| 7     | SLMIV / - + - - +                   | 3         | L     |
| 7     | VIMLS / - + + - +                   | 18        | L     |
| 8     | GLTR / + + - +                      | 6         | T     |
| 8     | IQVKGLTRKR / - + + + - - + + -      | 7         | T     |
| 8     | IVQRLTRKGW / + - - - - + + - +      | 18        | L     |
| 8     | RKRTLGVQI / + - - + + - - - +       | 3         | T     |
