# Supplementary material for: Targeting tRNA-synthetase interactions towards novel therapeutic discovery against eukaryotic pathogens
Source: PubMed Central journal article supplement (PMC7046186; doi:10.1371/journal.pntd.0007983), 2020-02-27
Supplement: pntd.0007983.s049.pdf [file pntd.0007983.s049.pdf]

Supplementary Table 4 — Gene Length, Structure and Functional Type Statistics on Final Annotation Gene Sets

|                              | Intersection Set | Aragorn-Only | Union Set |
|------------------------------|------------------|--------------|-----------|
| <b>#tRNA genes</b>           | 3579             | 36           | 3616      |
| <b>Avg. gene length</b>      | 74               | 98           | 75        |
| <b>Min. gene length</b>      | 68               | 71           | 68        |
| <b>Max. gene length</b>      | 89               | 206          | 206       |
| <b>%intron</b>               | 2                | 28           | 3         |
| <b>%GC</b>                   | 58               | 59           | 58        |
| <b>#Ala tRNA genes</b>       | 210              | 2            | 212       |
| <b>#Cys tRNA genes</b>       | 64               | 1            | 65        |
| <b>#Asp tRNA genes</b>       | 105              | 1            | 106       |
| <b>#Glu tRNA genes</b>       | 160              | 1            | 161       |
| <b>#Phe tRNA genes</b>       | 104              | 2            | 106       |
| <b>#Gly tRNA genes</b>       | 228              | 3            | 231       |
| <b>#His tRNA genes</b>       | 80               | 4            | 84        |
| <b>#Ile tRNA genes</b>       | 171              | 1            | 172       |
| <b>#Lys tRNA genes</b>       | 183              | 1            | 184       |
| <b>#Leu tRNA genes</b>       | 335              | 6            | 341       |
| <b>#Met tRNA genes</b>       | 97               | 0            | 97        |
| <b>#Asn tRNA genes</b>       | 125              | 0            | 125       |
| <b>#Pro tRNA genes</b>       | 200              | 0            | 200       |
| <b>#Gln tRNA genes</b>       | 161              | 0            | 161       |
| <b>#Arg tRNA genes</b>       | 348              | 2            | 350       |
| <b>#Ser tRNA genes</b>       | 228              | 7            | 235       |
| <b>#Thr tRNA genes</b>       | 218              | 4            | 222       |
| <b>#Val tRNA genes</b>       | 236              | 0            | 236       |
| <b>#Trp tRNA genes</b>       | 52               | 1            | 53        |
| <b>#iMet tRNA genes</b>      | 76               | 0            | 76        |
| <b>#Tyr tRNA genes</b>       | 88               | 0            | 88        |
| <b>#SeC tRNA genes</b>       | 76               | 0            | 76        |
| <b>#Ambiguous tRNA genes</b> | 34               | 0            | 35        |
