# Supplementary material for: Targeting tRNA-synthetase interactions towards novel therapeutic discovery against eukaryotic pathogens
Source: PubMed Central journal article supplement (PMC7046186; doi:10.1371/journal.pntd.0007983), 2020-02-27
Supplement: pntd.0007983.s050.pdf [file pntd.0007983.s050.pdf]

Supplementary Table 5 — Nucleotide Composition of TriTryp tRNA Gene-Sets by Individual Genome Assembly, Organized by Clade (alternating background in the order of Table 1, boldface) or excluded (at end of table in roman font)

| Genome                           | Genes | Pooled %G | Pooled %C | Pooled %T |
|----------------------------------|-------|-----------|-----------|-----------|
| LaethiopiaL147                   | 83    | 32.0      | 26.1      | 23.4      |
| LarabicaLEM1108                  | 85    | 31.8      | 26.0      | 23.5      |
| LgerbilliLEM452                  | 81    | 31.9      | 26.2      | 23.3      |
| LmajorFriedlin                   | 84    | 32.0      | 26.1      | 23.4      |
| LmajorLV39c5                     | 84    | 31.9      | 26.1      | 23.4      |
| LmajorSD75                       | 82    | 32.0      | 26.1      | 23.4      |
| LtropicalL590                    | 87    | 31.9      | 26.0      | 23.4      |
| LturanticaLEM423                 | 86    | 31.9      | 26.1      | 23.3      |
| LdonovaniBPK282A1                | 85    | 31.9      | 26.1      | 23.3      |
| LdonovaniBHU1220                 | 84    | 31.9      | 26.1      | 23.3      |
| LinfantumJPCM5                   | 84    | 31.9      | 26.0      | 23.4      |
| LmexicanaMHOMGT2001U1103         | 84    | 31.9      | 26.0      | 23.4      |
| LamazonensisMHOMBR71973M2269     | 66    | 31.8      | 25.9      | 23.4      |
| LbraziliensisMHOMBR75M2903       | 86    | 31.8      | 26.0      | 23.5      |
| LbraziliensisMHOMBR75M2904       | 83    | 32.0      | 26.1      | 23.4      |
| LpanamensisMHOMCOL81L13          | 88    | 31.8      | 26.2      | 23.3      |
| LpanamensisMHOMPA94PSC1          | 74    | 31.9      | 26.1      | 23.3      |
| LenriettiiLEM3045                | 82    | 31.9      | 26.0      | 23.4      |
| LspMARLEM2494                    | 80    | 31.9      | 25.9      | 23.4      |
| CfasciculataCfCI                 | 105   | 31.8      | 26.0      | 23.4      |
| LpyrrhocrisH10                   | 104   | 31.9      | 26.1      | 23.3      |
| LseymouriATCC30220               | 94    | 31.9      | 26.0      | 23.3      |
| TcruziCLBrenerEsmeraldo-like     | 57    | 32.3      | 26.3      | 23.1      |
| TcruziCLBrenerNon-Esmeraldo-like | 57    | 32.2      | 26.4      | 22.9      |

|                               |            |             |             |             |
|-------------------------------|------------|-------------|-------------|-------------|
| <b>TcruzimarinkelleiB7</b>    | <b>57</b>  | <b>32.3</b> | <b>26.5</b> | <b>22.8</b> |
| <b>TcruziDm28c</b>            | <b>51</b>  | <b>32.3</b> | <b>26.4</b> | <b>22.8</b> |
| <b>TcruzicruziDm28c</b>       | <b>97</b>  | <b>32.5</b> | <b>26.3</b> | <b>23.0</b> |
| <b>TcruziEsmeraldo</b>        | <b>74</b>  | <b>32.2</b> | <b>26.2</b> | <b>22.8</b> |
| <b>TcruziJRcl4</b>            | <b>74</b>  | <b>32.2</b> | <b>26.0</b> | <b>23.0</b> |
| <b>TcruziTulacl2</b>          | <b>121</b> | <b>32.2</b> | <b>26.4</b> | <b>23.0</b> |
| <b>TcruziSylvioX10-1</b>      | <b>69</b>  | <b>32.2</b> | <b>26.2</b> | <b>23.1</b> |
| <b>TcruziSylvioX10-1-2012</b> | <b>72</b>  | <b>32.1</b> | <b>26.4</b> | <b>22.8</b> |
| <b>TgrayiANR4</b>             | <b>95</b>  | <b>32.5</b> | <b>26.3</b> | <b>23.0</b> |
| <b>TbruceigambienseDAL972</b> | <b>64</b>  | <b>32.7</b> | <b>26.4</b> | <b>22.8</b> |
| <b>TbruceiLister427</b>       | <b>67</b>  | <b>32.6</b> | <b>26.4</b> | <b>22.9</b> |
| <b>TbruceiTREU927</b>         | <b>73</b>  | <b>32.5</b> | <b>26.3</b> | <b>22.9</b> |
| <b>TcongolenseLL3000</b>      | <b>72</b>  | <b>32.7</b> | <b>26.5</b> | <b>22.9</b> |
| <b>TevansiSTIB805</b>         | <b>67</b>  | <b>32.6</b> | <b>26.4</b> | <b>22.9</b> |
| <b>TvivaxY486</b>             | <b>82</b>  | <b>31.0</b> | <b>25.2</b> | <b>23.9</b> |
| <b>TtheileriEdinburgh</b>     | <b>159</b> | <b>32.2</b> | <b>26.3</b> | <b>22.7</b> |
| <b>EmonterogeeiiLV88</b>      | <b>104</b> | <b>31.6</b> | <b>26.1</b> | <b>23.2</b> |
| <b>BayalaiB08-376</b>         | <b>69</b>  | <b>31.6</b> | <b>26.3</b> | <b>23.1</b> |
| <b>LtarentolaeParrotTarII</b> | <b>79</b>  | <b>31.8</b> | <b>26.0</b> | <b>23.4</b> |
| <b>PconfusumCUL13</b>         | <b>61</b>  | <b>32.2</b> | <b>26.2</b> | <b>22.9</b> |
| <b>TrangeliSC58</b>           | <b>6</b>   | <b>29.4</b> | <b>25.3</b> | <b>24.0</b> |
| <b>TcruziCLBrener</b>         | <b>18</b>  | <b>33.3</b> | <b>26.4</b> | <b>22.9</b> |
