# Supplementary material for: Targeting tRNA-synthetase interactions towards novel therapeutic discovery against eukaryotic pathogens
Source: PubMed Central journal article supplement (PMC7046186; doi:10.1371/journal.pntd.0007983), 2020-02-27
Supplement: pntd.0007983.s051.pdf [file pntd.0007983.s051.pdf]

Supplementary Table 6 — Values of four replicate count-per-minute endpoints (taken at time  $t = 10$  min. in time-course measurements as in Fig. 9C) of *Leishmania major* AlaRS under DMSO or without added enzyme, their means and standard deviations, and their corresponding Z-factor in the scintillation counter-based aminoacylation time-course assay.

| Replicate | DMSO Endpoint | No Enzyme Endpoint |
|-----------|---------------|--------------------|
| 1         | 2674          | 25                 |
| 2         | 2844          | 20                 |
| 3         | 2814          | 27                 |
| 4         | 3047          | 326                |
| mean      | 2844.75       | 99.5               |
| std. dev. | 153.8         | 151.03             |
| <b>Z'</b> | <b>0.67</b>   |                    |
