# Supplementary material for: Targeting tRNA-synthetase interactions towards novel therapeutic discovery against eukaryotic pathogens
Source: PLoS Negl Trop Dis. 2020 Feb 27;14(2):e0007983. doi: 10.1371/journal.pntd.0007983 (PMC7046186; doi:10.1371/journal.pntd.0007983)

Distributions of Aragorn Scores  $\geq 100$  bits for Ara-Only Singletons (n=730) vs Ara-Only Genes Co-Clustered with Other Genes (n=20)

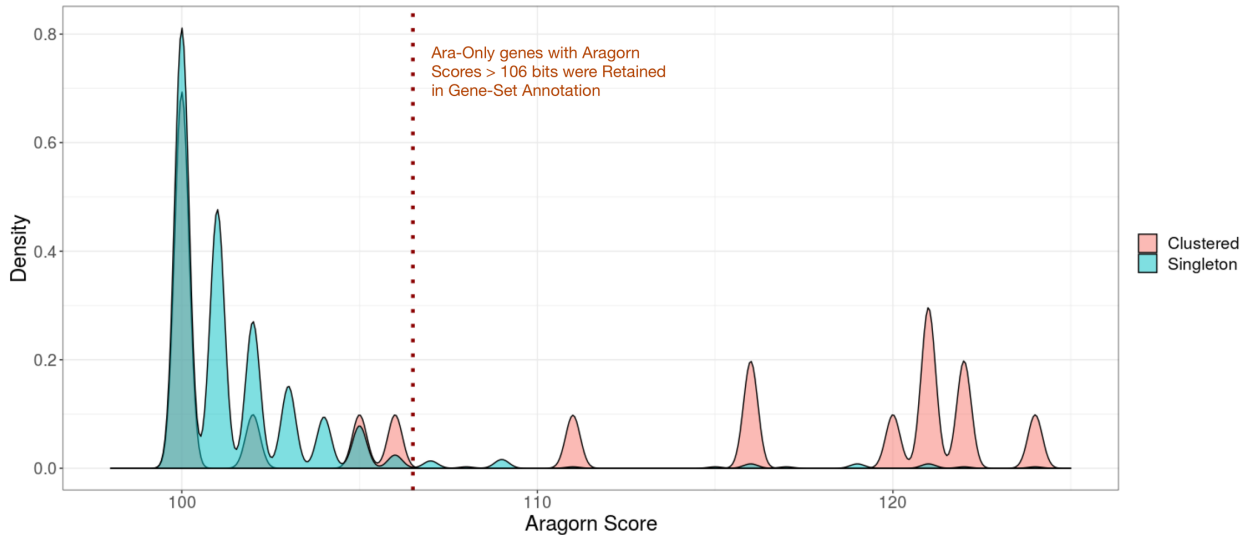

Supplement: S1 Fig — (PDF) [file pntd.0007983.s001.pdf]
